# Supplementary material
Source: PubMed Central journal article supplement (PMC11154909)
Supplement: NIHMS1994041-supplement-supplementary_table_1.pdf [file NIHMS1994041-supplement-supplementary_table_1.pdf]

Characteristics of International Cirrhosis Clinical Trials Reporting Data on Race and Ethnicity of Study Participants (n=118)

| Author                         | Year | Intervention                                                                                                                                              | Total Randomized | Sex (n, % total) |              | White        | Black |
|--------------------------------|------|-----------------------------------------------------------------------------------------------------------------------------------------------------------|------------------|------------------|--------------|--------------|-------|
|                                |      |                                                                                                                                                           |                  | Male             | Female       |              |       |
| Macken L<br><i>UK</i>          | 2020 | Palliative long-term abdominal drains vs. LVP in refractory ascites due to cirrhosis                                                                      | 36               | 27<br>(75)       | 9<br>(25)    | 35<br>(97.2) | NR    |
| Dunne PDJ<br><i>UK</i>         | 2020 | Standard of care vs. early TIPSS in patients with cirrhosis and oesophageal variceal bleeding                                                             | 58               | 39<br>(67.2)     | 19<br>(32.8) | NR           | NR    |
| Aamann L<br><i>Denmark</i>     | 2020 | Resistance Training Increases Muscle Strength and Muscle Size in Patients With Liver Cirrhosis                                                            | 39               | 30<br>(76.9)     | 9<br>(23.1)  | NR           | NR    |
| Lv Y<br><i>China</i>           | 2019 | Early TIPS with covered stents versus standard treatment for acute variceal bleeding in patients with advanced cirrhosis                                  | 129              | 87<br>(67.4)     | 42<br>(32.6) | NR           | NR    |
| Kumar M<br><i>India</i>        | 2020 | Thromboelastography-Guided Blood Component Use in Patients With Cirrhosis With Nonvariceal Bleeding                                                       | 96               | 78<br>(81.3)     | 18<br>(18.8) | NR           | NR    |
| Lv Y<br><i>China</i>           | 2018 | Covered TIPS versus endoscopic band ligation plus propranolol for the prevention of variceal rebleeding in cirrhotic patients with portal vein thrombosis | 49               | 29<br>(59.2)     | 20<br>(40.8) | NR           | NR    |
| Bureau C<br><i>Multicenter</i> | 2017 | Alfapump® system vs. large volume paracentesis for refractory ascites                                                                                     | 58               | 46<br>(79.3)     | 12<br>(20.7) | NR           | NR    |
| Wang Q<br><i>China</i>         | 2017 | Eight millimetre covered TIPS does not compromise shunt function but reduces hepatic encephalopathy in preventing variceal rebleeding                     | 127              | 78<br>(61.4)     | 49<br>(38.6) | NR           | NR    |
| Villanueva C<br><i>Spain</i>   | 2017 | A randomized trial to assess whether portal pressure guided therapy to prevent variceal rebleeding improves survival in cirrhosis                         | 170              | 108<br>(63.5)    | 62<br>(36.5) | NR           | NR    |
| Bureau C<br><i>France</i>      | 2017 | Transjugular Intrahepatic Portosystemic Shunts With Covered Stents Increase Transplant-Free Survival of Patients With Cirrhosis and Recurrent Ascites     | 62               | 44<br>(71.0)     | 18<br>(29.0) | NR           | NR    |

|                                 |      |                                                                                                                                                                   |     |               |              |              |    |
|---------------------------------|------|-------------------------------------------------------------------------------------------------------------------------------------------------------------------|-----|---------------|--------------|--------------|----|
| Escorsell A<br><i>Spain</i>     | 2016 | Esophageal balloon tamponade versus esophageal stent in controlling acute refractory variceal bleeding: A multicenter randomized, controlled trial                | 28  | 25<br>(89.3)  | 3<br>(10.7)  | NR           | NR |
| Maharshi S<br><i>India</i>      | 2016 | Efficacy of Nutritional Therapy for Patients With Cirrhosis and Minimal Hepatic Encephalopathy in a Randomized Trial                                              | 120 | 95<br>(79.2)  | 25<br>(20.8) | NR           | NR |
| De Pietri L<br><i>Italy</i>     | 2016 | Thrombelastography-guided blood product use before invasive procedures in cirrhosis with severe coagulopathy                                                      | 60  | 38<br>(63.3)  | 22<br>(36.7) | NR           | NR |
| Sauerbruch T<br><i>Germany</i>  | 2015 | Prevention of Rebleeding From Esophageal Varices in Patients With Cirrhosis Receiving Small-Diameter Stents Versus Hemodynamically Controlled Medical Therapy     | 185 | 125<br>(67.6) | 60<br>(32.4) | NR           | NR |
| Zenith L<br><i>Canada</i>       | 2014 | Eight weeks of exercise training increases aerobic capacity and muscle mass and reduces fatigue in patients with cirrhosis                                        | 19  | 15<br>(78.9)  | 4<br>(21.1)  | 16<br>(84.2) | NR |
| Perarnau JM<br><i>France</i>    | 2014 | Covered vs. uncovered stents for transjugular intrahepatic portosystemic shunt                                                                                    | 136 | 102<br>(75.0) | 34<br>(25.0) | NR           | NR |
| Shah HA<br><i>Pakistan</i>      | 2014 | Carvedilol vs. esophageal variceal band ligation in the primary prophylaxis of variceal hemorrhage                                                                | 168 | 122<br>(72.6) | 46<br>(27.4) | NR           | NR |
| Wigg AJ<br><i>Australia</i>     | 2013 | Efficacy of a chronic disease management model for patients with chronic liver failure                                                                            | 60  | 40<br>(66.7)  | 20<br>(33.3) | NR           | NR |
| Bañares R<br><i>Multicenter</i> | 2013 | Extracorporeal albumin dialysis with the molecular adsorbent recirculating system in acute-on-chronic liver failure: the RELIEF trial                             | 179 | 123<br>(68.7) | 56<br>(31.3) | NR           | NR |
| Dupont B<br><i>France</i>       | 2012 | Randomised clinical trial: enteral nutrition does not improve the long-term outcome of alcoholic cirrhotic patients with jaundice                                 | 99  | 65<br>(65.7)  | 34<br>(34.3) | NR           | NR |
| García-Pagán JC<br><i>Spain</i> | 2010 | Early use of TIPS in patients with cirrhosis and variceal bleeding                                                                                                | 63  | 44<br>(69.8)  | 19<br>(30.2) | NR           | NR |
| Riggio O<br><i>Italy</i>        | 2010 | Clinical efficacy of transjugular intrahepatic portosystemic shunt created with covered stents with different diameters: results of a randomized controlled trial | 45  | 28<br>(62.2)  | 17<br>(37.8) | NR           | NR |
| Licata G<br><i>Italy</i>        | 2009 | Clinical Trial: High-dose furosemide + small-volume hypertonic saline solutions vs. repeated paracentesis as treatment of refractory ascites                      | 84  | 53<br>(63.1)  | 31<br>(36.9) | NR           | NR |

|                                       |      |                                                                                                                                                                               |     |               |              |    |    |
|---------------------------------------|------|-------------------------------------------------------------------------------------------------------------------------------------------------------------------------------|-----|---------------|--------------|----|----|
| Lo GH<br><i>Taiwan</i>                | 2009 | Low-dose terlipressin plus banding ligation versus low-dose terlipressin alone in the prevention of very early rebleeding of oesophageal varices                              | 93  | 77<br>(82.8)  | 16<br>(17.2) | NR | NR |
| García-Pagán JC<br><i>Multicenter</i> | 2009 | Nadolol + isosorbide mononitrate alone or associated with band ligation in the prevention of recurrent bleeding                                                               | 158 | 118<br>(74.7) | 40<br>(25.3) | NR | NR |
| Villanueva C<br><i>Spain</i>          | 2009 | A randomized controlled study on prevention of variceal rebleeding comparing nadolol + ligation vs. hepatic venous pressure gradient-guided pharmacological therapy           | 59  | 38<br>(64.4)  | 21<br>(35.6) | NR | NR |
| Plank LD<br><i>Australia</i>          | 2008 | Nocturnal nutritional supplementation improves total body protein status of patients with liver cirrhosis                                                                     | 103 | 85<br>(82.5)  | 18<br>(17.5) | NR | NR |
| Romero G<br><i>Argentina</i>          | 2006 | Comparative study between nadolol and 5-isosorbide mononitrate vs. endoscopic band ligation plus sclerotherapy in the prevention of variceal rebleeding in cirrhotic patients | 109 | 72<br>(66.1)  | 37<br>(33.9) | NR | NR |
| Tan PC<br><i>Taiwan</i>               | 2006 | A randomized trial of endoscopic treatment of acute gastric variceal hemorrhage: N-butyl-2-cyanoacrylate injection versus band ligation                                       | 97  | 69<br>(71.1)  | 28<br>(28.9) | NR | NR |
| Triantos C<br><i>Greece</i>           | 2005 | Primary prophylaxis of variceal bleeding in cirrhotics unable to take beta-blockers with endoscopic variceal ligation                                                         | 52  | 38<br>(73.1)  | 14<br>(26.9) | NR | NR |
| Salerno F<br><i>Italy</i>             | 2004 | Randomized controlled study of TIPS versus paracentesis plus albumin in cirrhosis with severe ascites                                                                         | 66  | 49<br>(74.2)  | 17<br>(25.8) | NR | NR |
| Schepke M<br><i>Germany</i>           | 2004 | Ligation versus propranolol for the primary prophylaxis of variceal bleeding in cirrhosis                                                                                     | 152 | 104<br>(68.4) | 48<br>(31.6) | NR | NR |
| Ginès P<br><i>Spain</i>               | 2002 | Transjugular intrahepatic portosystemic shunting versus paracentesis plus albumin for refractory ascites in cirrhosis                                                         | 70  | 50<br>(71.4)  | 20<br>(28.6) | NR | NR |
| Patch D<br><i>Multicenter</i>         | 2002 | A randomized, controlled trial of medical therapy versus endoscopic ligation for the prevention of variceal rebleeding in patients with cirrhosis                             | 102 | 70<br>(68.6)  | 32<br>(31.4) | NR | NR |
| Lui HF<br><i>Scotland (UK)</i>        | 2002 | Primary prophylaxis of variceal hemorrhage: a randomized controlled trial comparing band ligation, propranolol, and isosorbide mononitrate                                    | 172 | 97<br>(56.4)  | 75<br>(43.6) | NR | NR |
| Escorsell A<br><i>Spain</i>           | 2002 | TIPS versus drug therapy in preventing variceal rebleeding in advanced cirrhosis                                                                                              | 91  | 68<br>(74.7)  | 23<br>(25.3) | NR | NR |

|                                      |      |                                                                                                                                                                                                   |     |               |               |    |    |
|--------------------------------------|------|---------------------------------------------------------------------------------------------------------------------------------------------------------------------------------------------------|-----|---------------|---------------|----|----|
| Pomier-Layrargues G<br><i>Canada</i> | 2001 | Transjugular intrahepatic portosystemic shunt (TIPS) versus endoscopic variceal ligation in the prevention of variceal rebleeding in patients with cirrhosis                                      | 80  | 56<br>(70.0)  | 24<br>(30.0)  | NR | NR |
| Escorsell A<br><i>Multicenter</i>    | 2000 | Multicenter randomized controlled trial of terlipressin versus sclerotherapy in the treatment of acute variceal bleeding: the TEST study                                                          | 219 | 158<br>(72.1) | 61<br>(27.9)  | NR | NR |
| Rössle M<br><i>Germany</i>           | 2000 | A comparison of paracentesis and transjugular intrahepatic portosystemic shunting in patients with ascites                                                                                        | 60  | 42<br>(70.0)  | 18<br>(30.0)  | NR | NR |
| Zuberi BF<br><i>Pakistan</i>         | 2000 | Comparison of endoscopic variceal sclerotherapy alone and in combination with octreotide in controlling acute variceal hemorrhage and early rebleeding in patients with low-risk cirrhosis        | 70  | NR            | NR            | NR | NR |
| China L<br><i>UK</i>                 | 2021 | A Randomized Trial of Albumin Infusions in Hospitalized Patients with Cirrhosis                                                                                                                   | 777 | 550<br>(70.8) | 227<br>(29.2) | NR | NR |
| De A<br><i>India</i>                 | 2021 | Multiple Cycles of Granulocyte Colony-Stimulating Factor Increase Survival Times of Patients With Decompensated Cirrhosis in a Randomized Trial                                                   | 100 | 85<br>(85.0)  | 15<br>(15.0)  | NR | NR |
| Vijayaraghavan R<br><i>India</i>     | 2020 | Hemodynamic Effects of Adding Simvastatin to Carvedilol for Primary Prophylaxis of Variceal Bleeding: A Randomized Controlled Trial                                                               | 220 | 182<br>(82.7) | 38<br>(17.3)  | NR | NR |
| Arora V<br><i>India</i>              | 2020 | Paracentesis-Induced Circulatory Dysfunction With Modest-Volume Paracentesis Is Partly Ameliorated by Albumin Infusion in Acute-on-Chronic Liver Failure                                          | 80  | NR            | NR            | NR | NR |
| Fernández J<br><i>Multicenter</i>    | 2020 | Efficacy of Albumin Treatment for Patients with Cirrhosis and Infections Unrelated to Spontaneous Bacterial Peritonitis                                                                           | 118 | 74<br>(62.7)  | 44<br>(37.3)  | NR | NR |
| Villanueva C<br><i>Spain</i>         | 2019 | $\beta$ blockers to prevent decompensation of cirrhosis in patients with clinically significant portal hypertension (PREDESCI): a randomised, double-blind, placebo-controlled, multicentre trial | 201 | 123<br>(61.2) | 78<br>(38.8)  | NR | NR |
| Moreau R<br><i>France</i>            | 2018 | Effects of Long-term Norfloxacin Therapy in Patients With Advanced Cirrhosis                                                                                                                      | 291 | 202<br>(69.4) | 89<br>(30.6)  | NR | NR |
| Solà E<br><i>Spain</i>               | 2018 | Midodrine and albumin for prevention of complications in patients with cirrhosis awaiting liver transplantation. A randomized placebo-controlled trial                                            | 173 | 137<br>(79.2) | 36<br>(20.8)  | NR | NR |

|                                 |      |                                                                                                                                                                                           |     |               |               |              |    |
|---------------------------------|------|-------------------------------------------------------------------------------------------------------------------------------------------------------------------------------------------|-----|---------------|---------------|--------------|----|
| Vidot H<br><i>Australia</i>     | 2018 | Randomised clinical trial: oral taurine supplementation versus placebo reduces muscle cramps in patients with chronic liver disease                                                       | 30  | 21<br>(70.0)  | 9<br>(30.0)   | NR           | NR |
| Arora V<br><i>India</i>         | 2020 | Terlipressin Is Superior to Noradrenaline in the Management of Acute Kidney Injury in Acute on Chronic Liver Failure                                                                      | 120 | 113<br>(94.2) | 7<br>(5.80)   | NR           | NR |
| Yim HJ<br><i>South Korea</i>    | 2018 | Daily Norfloxacin vs. Weekly Ciprofloxacin to Prevent Spontaneous Bacterial Peritonitis: A Randomized Controlled Trial                                                                    | 124 | 90<br>(72.6)  | 34<br>(27.4)  | NR           | NR |
| Caraceni P<br><i>Italy</i>      | 2018 | Long-term albumin administration in decompensated cirrhosis (ANSWER): an open-label randomised trial                                                                                      | 431 | 296           | 135           | NR           | NR |
| El-Khayat H<br><i>Egypt</i>     | 2018 | Sofosbuvir plus daclatasvir with or without ribavirin in 551 patients with hepatitis C-related cirrhosis, genotype 4                                                                      | 540 | 426<br>(78.9) | 114<br>(21.1) | NR           | NR |
| Verma N                         | 2018 | Outcomes after multiple courses of granulocyte colony-stimulating factor and growth hormone in decompensated cirrhosis: A randomized trial                                                | 65  | 52<br>(80.0)  | 13<br>(20.0)  | NR           | NR |
| Sidhu SS                        | 2018 | L-ornithine L-aspartate in bouts of overt hepatic encephalopathy                                                                                                                          | 193 | 173<br>(89.6) | 20<br>(10.4)  | NR           | NR |
| Asselah T<br><i>Multicenter</i> | 2016 | Ombitasvir, paritaprevir, and ritonavir plus ribavirin in adults with hepatitis C virus genotype 4 infection and cirrhosis (AGATE-I): a multicentre, phase 3, randomised open-label trial | 184 | 130<br>(70.7) | 54<br>(29.3)  | NR           | NR |
| Kim SG<br><i>South Korea</i>    | 2016 | A Randomized, Multi-Center, Open-Label Study to Evaluate the Efficacy of Carvedilol vs. Propranolol to Reduce Portal Pressure in Patients With Liver Cirrhosis                            | 110 | 83<br>(75.5)  | 27<br>(24.5)  | NR           | NR |
| Sinclair M<br><i>Australia</i>  | 2016 | Testosterone therapy increases muscle mass in men with cirrhosis and low testosterone: A randomised controlled trial                                                                      | 101 | 101<br>(100)  | 0<br>(0.0)    | 92<br>(91.1) | NR |
| Bhardwaj A<br><i>India</i>      | 2017 | Carvedilol delays the progression of small oesophageal varices in patients with cirrhosis: a randomised placebo-controlled trial                                                          | 140 | 119<br>(85.0) | 21<br>(15.0)  | NR           | NR |
| Abraldes JG<br><i>Spain</i>     | 2016 | Addition of Simvastatin to Standard Therapy for the Prevention of Variceal Rebleeding Does Not Reduce Rebleeding but Increases Survival in Patients With Cirrhosis                        | 147 | 98<br>(66.7)  | 49<br>(33.3)  | NR           | NR |

|                                 |      |                                                                                                                                                                                                                               |     |               |               |               |              |
|---------------------------------|------|-------------------------------------------------------------------------------------------------------------------------------------------------------------------------------------------------------------------------------|-----|---------------|---------------|---------------|--------------|
| Merli M<br><i>Italy</i>         | 2016 | An empirical broad spectrum antibiotic therapy in health-care-associated infections improves survival in patients with cirrhosis: A randomized trial                                                                          | 94  | 67<br>(71.3)  | 27<br>(28.7)  | NR            | NR           |
| Foster GR<br><i>Multicenter</i> | 2015 | Efficacy of sofosbuvir plus ribavirin with or without peginterferon-alfa in patients with hepatitis C virus genotype 3 infection and treatment-experienced patients with cirrhosis and hepatitis C virus genotype 2 infection | 592 | 395<br>(66.7) | 197<br>(33.3) | 495<br>(83.6) | 6<br>(1.01)  |
| Piano S<br><i>Italy</i>         | 2016 | The empirical antibiotic treatment of nosocomial spontaneous bacterial peritonitis: Results of a randomized, controlled clinical trial                                                                                        | 31  | 19<br>(61.3)  | 12<br>(38.7)  | NR            | NR           |
| Kedarisetty CK<br><i>India</i>  | 2015 | Combination of granulocyte colony-stimulating factor and erythropoietin improves outcomes of patients with decompensated cirrhosis                                                                                            | 55  | 53<br>(96.4)  | 2<br>(3.63)   | NR            | NR           |
| Cavallin M<br><i>Italy</i>      | 2015 | Terlipressin plus albumin versus midodrine and octreotide plus albumin in the treatment of hepatorenal syndrome: A randomized trial                                                                                           | 48  | 32<br>(66.7)  | 16<br>(33.3)  | NR            | NR           |
| Thévenot T<br><i>France</i>     | 2015 | Effect of albumin in cirrhotic patients with infection other than spontaneous bacterial peritonitis. A randomized trial                                                                                                       | 191 | 130<br>(68.1) | 61<br>(31.9)  | NR            | NR           |
| Poordad F<br><i>Multicenter</i> | 2014 | ABT-450/r-ombitasvir and dasabuvir with ribavirin for hepatitis C with cirrhosis                                                                                                                                              | 380 | 267<br>(70.3) | 113<br>(29.7) | 360<br>(94.7) | 12<br>(3.20) |
| Seo YS<br><i>South Korea</i>    | 2014 | Lack of difference among terlipressin, somatostatin, and octreotide in the control of acute gastroesophageal variceal hemorrhage                                                                                              | 780 | 666<br>(85.4) | 114<br>(14.6) | NR            | NR           |
| Lunia MK<br><i>India</i>        | 2014 | Probiotics prevent hepatic encephalopathy in patients with cirrhosis: a randomized controlled trial                                                                                                                           | 160 | 96<br>(0.60)  | 64<br>(0.40)  | NR            | NR           |
| Sharma BC<br><i>India</i>       | 2013 | A randomized, double-blind, controlled trial comparing rifaximin plus lactulose with lactulose alone in treatment of overt hepatic encephalopathy                                                                             | 120 | 89<br>(74.2)  | 31<br>(25.8)  | NR            | NR           |
| Simón-Talero M<br><i>Spain</i>  | 2013 | Effects of intravenous albumin in patients with cirrhosis and episodic hepatic encephalopathy: a randomized double-blind study                                                                                                | 56  | 42<br>(75.0)  | 14<br>(25.0)  | NR            | NR           |
| Singh V<br><i>India</i>         | 2013 | Midodrine and clonidine in patients with cirrhosis and refractory or recurrent ascites: a randomized pilot study                                                                                                              | 60  | 56<br>(93.3)  | 4<br>(6.70)   | NR            | NR           |

|                                 |      |                                                                                                                                                                                                                                                  |     |               |               |               |    |
|---------------------------------|------|--------------------------------------------------------------------------------------------------------------------------------------------------------------------------------------------------------------------------------------------------|-----|---------------|---------------|---------------|----|
| Afdhal NH<br><i>Multicenter</i> | 2012 | Eltrombopag before procedures in patients with cirrhosis and thrombocytopenia                                                                                                                                                                    | 292 | 188<br>(64.4) | 104<br>(35.6) | 178<br>(61.0) | NR |
| Villa E<br><i>Italy</i>         | 2012 | Enoxaparin prevents portal vein thrombosis and liver decompensation in patients with advanced cirrhosis                                                                                                                                          | 70  | 51<br>(72.9)  | 19<br>(27.1)  | NR            | NR |
| Guevara M<br><i>Spain</i>       | 2012 | Albumin for bacterial infections other than spontaneous bacterial peritonitis in cirrhosis. A randomized, controlled study                                                                                                                       | 97  | 62<br>(63.9)  | 35<br>(36.1)  | NR            | NR |
| Agrawal A<br><i>India</i>       | 2012 | Secondary prophylaxis of hepatic encephalopathy in cirrhosis: an open-label, randomized controlled trial of lactulose, probiotics, and no therapy                                                                                                | 235 | 199<br>(84.7) | 36<br>(15.3)  | NR            | NR |
| Singh V<br><i>India</i>         | 2012 | Midodrine in patients with cirrhosis and refractory or recurrent ascites: a randomized pilot study                                                                                                                                               | 40  | 37<br>(92.5)  | 3<br>(7.5)    | NR            | NR |
| Les I<br><i>Spain</i>           | 2011 | Effects of branched-chain amino acids supplementation in patients with cirrhosis and a previous episode of hepatic encephalopathy: a randomized study                                                                                            | 116 | 88<br>(75.9)  | 28<br>(24.1)  | NR            | NR |
| Sidhu SS<br><i>India</i>        | 2011 | Rifaximin improves psychometric performance and health-related quality of life in patients with minimal hepatic encephalopathy (the RIME Trial)                                                                                                  | 115 | 88<br>(76.5)  | 27<br>(23.5)  | NR            | NR |
| Khamaysi I<br><i>Israel</i>     | 2011 | Sub-clinical hepatic encephalopathy in cirrhotic patients is not aggravated by sedation with propofol compared to midazolam: a randomized controlled study                                                                                       | 91  | 50<br>(54.9)  | 41<br>(45.1)  | NR            | NR |
| Yang YY<br><i>Taiwan</i>        | 2010 | Association of the G-protein and $\alpha$ 2-adrenergic receptor gene and plasma norepinephrine level with clonidine improvement of the effects of diuretics in patients with cirrhosis with refractory ascites: a randomised clinical trial      | 270 | NR            | NR            | 0             | 0  |
| Lebrec D<br><i>France</i>       | 2010 | Pentoxifylline does not decrease short-term mortality but does reduce complications in patients with advanced cirrhosis                                                                                                                          | 342 | NR            | NR            | NR            | NR |
| Ginès P<br><i>Multicenter</i>   | 2010 | Clinical trial: short-term effects of combination of satavaptan, a selective vasopressin V2 receptor antagonist, and diuretics on ascites in patients with cirrhosis without hyponatraemia--a randomized, double-blind, placebo-controlled study | 148 | 103<br>(69.6) | 45<br>(30.4)  | NR            | NR |

|                                 |      |                                                                                                                                                                     |     |               |               |               |    |
|---------------------------------|------|---------------------------------------------------------------------------------------------------------------------------------------------------------------------|-----|---------------|---------------|---------------|----|
| Angeli P<br><i>Italy</i>        | 2010 | Combined versus sequential diuretic treatment of ascites in non-azotaemic patients with cirrhosis: results of an open randomised clinical trial                     | 100 | 67<br>(67.0)  | 33<br>(33.03) | NR            | NR |
| Sharma BC<br><i>India</i>       | 2009 | Secondary prophylaxis of hepatic encephalopathy: an open-label randomized controlled trial of lactulose versus placebo                                              | 140 | 104<br>(74.3) | 36<br>(25.7)  | NR            | NR |
| Abid S<br><i>Pakistan</i>       | 2009 | Terlipressin vs. octreotide in bleeding esophageal varices as an adjuvant therapy with endoscopic band ligation: a randomized double-blind placebo-controlled trial | 324 | NR            | NR            | NR            | NR |
| Sanyal AJ<br><i>Multicenter</i> | 2008 | A randomized, prospective, double-blind, placebo-controlled trial of terlipressin for type 1 hepatorenal syndrome                                                   | 112 | 80<br>(71.4)  | 32<br>(28.6)  | 100<br>(89.3) | NR |
| Martín-Llahí M<br><i>Spain</i>  | 2008 | Terlipressin and albumin vs albumin in patients with cirrhosis and hepatorenal syndrome: a randomized study                                                         | 46  | 29<br>(63.0)  | 17<br>(37.0)  | NR            | NR |
| Bosch J<br><i>Multicenter</i>   | 2008 | Recombinant factor VIIa for variceal bleeding in patients with advanced cirrhosis: A randomized, controlled trial                                                   | 256 | 187<br>(73.0) | 69<br>(27.0)  | NR            | NR |
| Fernández J<br><i>Spain</i>     | 2007 | Primary prophylaxis of spontaneous bacterial peritonitis delays hepatorenal syndrome and improves survival in cirrhosis                                             | 68  | 45<br>(66.2)  | 23<br>(33.8)  | NR            | NR |
| Di Marco V<br><i>Italy</i>      | 2007 | Peg-interferon alone or combined with ribavirin in HCV cirrhosis with portal hypertension: a randomized controlled trial                                            | 102 | 65<br>(63.7)  | 37<br>(36.3)  | NR            | NR |
| Prasad S<br><i>India</i>        | 2007 | Lactulose improves cognitive functions and health-related quality of life in patients with cirrhosis who have minimal hepatic encephalopathy                        | 90  | 80<br>(88.9)  | 10<br>(11.1)  | NR            | NR |
| Spahr L<br><i>Switzerland</i>   | 2007 | Histamine H1 blocker hydroxyzine improves sleep in patients with cirrhosis and minimal hepatic encephalopathy: a randomized controlled pilot trial                  | 35  | 25<br>(71.4)  | 10<br>(28.6)  | NR            | NR |
| Fernández J<br><i>Spain</i>     | 2006 | Norfloxacin vs ceftriaxone in the prophylaxis of infections in patients with advanced cirrhosis and hemorrhage                                                      | 111 | 86<br>(77.5)  | 25<br>(22.5)  | NR            | NR |
| Lenaerts A<br><i>Belgium</i>    | 2006 | Effects of clonidine on diuretic response in ascitic patients with cirrhosis and activation of sympathetic nervous system                                           | 61  | 40<br>(65.6)  | 21<br>(34.4)  | NR            | NR |



|                                 |      |                                                                                                                                                                                |     |               |               |    |    |
|---------------------------------|------|--------------------------------------------------------------------------------------------------------------------------------------------------------------------------------|-----|---------------|---------------|----|----|
| Bolondi L<br><i>Italy</i>       | 2006 | Effect of potassium canrenoate, an anti-aldosterone agent, on incidence of ascites and variceal progression in cirrhosis                                                       | 120 | 83<br>(69.2)  | 37<br>(30.8)  | NR | NR |
| Angeli P<br><i>Italy</i>        | 2006 | Switch therapy with ciprofloxacin vs. intravenous ceftazidime in the treatment of spontaneous bacterial peritonitis in patients with cirrhosis: similar efficacy at lower cost | 116 | 68<br>(58.6)  | 48<br>(41.4)  | NR | NR |
| Muto Y<br><i>Japan</i>          | 2005 | Effects of oral branched-chain amino acid granules on event-free survival in patients with liver cirrhosis                                                                     | 622 | 294<br>(47.3) | 328<br>(52.7) | NR | NR |
| Fernández J<br><i>Spain</i>     | 2005 | A randomized unblinded pilot study comparing albumin versus hydroxyethyl starch in spontaneous bacterial peritonitis                                                           | 20  | 11<br>(55.0)  | 9<br>(45.0)   | NR | NR |
| Riggio O<br><i>Italy</i>        | 2005 | Pharmacological prophylaxis of hepatic encephalopathy after transjugular intrahepatic portosystemic shunt: a randomized controlled study                                       | 75  | 49<br>(65.3)  | 26<br>(34.7)  | NR | NR |
| Gentile S<br><i>Italy</i>       | 2005 | A randomized controlled trial of acarbose in hepatic encephalopathy                                                                                                            | 107 | 45<br>(42.1)  | 62<br>(57.9)  | NR | NR |
| Bosch J<br><i>Spain</i>         | 2004 | Recombinant factor VIIa for upper gastrointestinal bleeding in patients with cirrhosis: a randomized, double-blind trial                                                       | 242 | 180<br>(74.4) | 62<br>(25.6)  | NR | NR |
| Merkel C<br><i>Italy</i>        | 2004 | A placebo-controlled clinical trial of nadolol in the prophylaxis of growth of small esophageal varices in cirrhosis                                                           | 161 | 83<br>(51.6)  | 78<br>(48.4)  | NR | NR |
| Liu Q<br><i>China</i>           | 2004 | Synbiotic modulation of gut flora: effect on minimal hepatic encephalopathy in patients with cirrhosis                                                                         | 194 | 176<br>(90.7) | 18<br>(9.3)   | NR | NR |
| Santos J<br><i>Spain</i>        | 2003 | Spirolactone alone or in combination with furosemide in the treatment of moderate ascites in nonazotemic cirrhosis. A randomized comparative study of efficacy and safety      | 100 | 75<br>(75.0)  | 25<br>(25.0)  | NR | NR |
| Marchesini G<br><i>Italy</i>    | 2003 | Nutritional supplementation with branched-chain amino acids in advanced cirrhosis: a double-blind, randomized trial                                                            | 174 | 110<br>(63.2) | 64<br>(36.8)  | NR | NR |
| García-Pagán JC<br><i>Spain</i> | 2003 | Propranolol plus placebo versus propranolol plus isosorbide-5-mononitrate in the prevention of a first variceal bleed: a double-blind RCT                                      | 349 | 241<br>(69.1) | 108<br>(30.9) | NR | NR |

|                                   |      |                                                                                                                                                                                            |     |               |              |    |    |
|-----------------------------------|------|--------------------------------------------------------------------------------------------------------------------------------------------------------------------------------------------|-----|---------------|--------------|----|----|
| Sola-Vera J<br><i>Spain</i>       | 2003 | Randomized trial comparing albumin and saline in the prevention of paracentesis-induced circulatory dysfunction in cirrhotic patients with ascites                                         | 72  | 47<br>(65.3)  | 25<br>(34.7) | NR | NR |
| Pelletier G<br><i>France</i>      | 2003 | A randomized controlled trial of ursodeoxycholic acid in patients with alcohol-induced cirrhosis and jaundice                                                                              | 226 | 139<br>(61.5) | 87<br>(38.5) | NR | NR |
| Abecasis R<br><i>Argentina</i>    | 2003 | Nadolol plus spironolactone in the prophylaxis of first variceal bleed in nonascitic cirrhotic patients: A preliminary study                                                               | 100 | 55<br>(55.0)  | 45<br>(45.0) | NR | NR |
| Mas A<br><i>Spain</i>             | 2003 | Comparison of rifaximin and lactitol in the treatment of acute hepatic encephalopathy: results of a randomized, double-blind, double-dummy, controlled clinical trial                      | 103 | 72<br>(69.9)  | 31<br>(30.1) | NR | NR |
| Bañares R<br><i>Spain</i>         | 2002 | Randomized comparison of long-term carvedilol and propranolol administration in the treatment of portal hypertension in cirrhosis                                                          | 51  | 34<br>(66.7)  | 17<br>(33.3) | NR | NR |
| Borroni G<br><i>Italy</i>         | 2002 | Nadolol is superior to isosorbide mononitrate for the prevention of the first variceal bleeding in cirrhotic patients with ascites                                                         | 52  | 37<br>(71.2)  | 15<br>(28.8) | NR | NR |
| Frossard JL<br><i>Switzerland</i> | 2002 | Erythromycin intravenous bolus infusion in acute upper gastrointestinal bleeding: a randomized, controlled, double-blind trial                                                             | 105 | 84<br>(80.0)  | 21<br>(20.0) | NR | NR |
| Calès P<br><i>France</i>          | 2001 | Early administration of vapreotide for variceal bleeding in patients with cirrhosis                                                                                                        | 196 | 148<br>(75.5) | 48<br>(24.5) | NR | NR |
| Ricart E<br><i>Spain</i>          | 2000 | Amoxicillin-clavulanic acid versus cefotaxime in the therapy of bacterial infections in cirrhotic patients                                                                                 | 80  | 37<br>(46.3)  | 43<br>(53.8) | NR | NR |
| Li CP<br><i>China</i>             | 2000 | Treatment of mastalgia with tamoxifen in male patients with liver cirrhosis: a randomized crossover study                                                                                  | 16  | 16<br>(100)   | 0<br>(0.0)   | NR | NR |
| Junquera F<br><i>Spain</i>        | 2000 | Somatostatin plus isosorbide 5-mononitrate versus somatostatin in the control of acute gastro-oesophageal variceal bleeding: a double blind, randomised, placebo controlled clinical trial | 60  | 43<br>(71.7)  | 17<br>(28.3) | NR | NR |









|    |    |    |    |             |
|----|----|----|----|-------------|
|    |    |    |    |             |
| NR | NR | NR | NR | NR          |
|    |    |    |    |             |
| NR | NR | NR | NR | NR          |
|    |    |    |    |             |
| NR | NR | NR | NR | NR          |
|    |    |    |    |             |
| NR | NR | NR | NR | NR          |
|    |    |    |    |             |
| NR | NR | NR | NR | NR          |
|    |    |    |    |             |
| NR | NR | NR | NR | 9<br>(4.90) |
|    |    |    |    |             |
| NR | NR | NR | NR | NR          |
|    |    |    |    |             |
| NR | NR | NR | NR | NR          |
|    |    |    |    |             |
| NR | NR | NR | NR | NR          |
|    |    |    |    |             |
| NR | NR | NR | NR | NR          |

|              |             |            |             |              |
|--------------|-------------|------------|-------------|--------------|
|              |             |            |             |              |
| NR           | NR          | NR         | NR          | NR           |
| 80<br>(13.5) | 2<br>(0.33) | 3<br>(0.5) | 2<br>(0.33) | NR           |
|              |             |            |             |              |
| NR           | NR          | NR         | NR          | NR           |
|              |             |            |             |              |
| NR           | NR          | NR         | NR          | NR           |
|              |             |            |             |              |
| NR           | NR          | NR         | NR          | NR           |
|              |             |            |             |              |
| NR           | NR          | NR         | NR          | NR           |
| 8<br>(2.1)   | NR          | NR         | NR          | 45<br>(11.8) |
|              |             |            |             |              |
| 780<br>(100) | NR          | NR         | NR          | NR           |
|              |             |            |             |              |
| NR           | NR          | NR         | NR          | NR           |
|              |             |            |             |              |
| NR           | NR          | NR         | NR          | NR           |
|              |             |            |             |              |
| NR           | NR          | NR         | NR          | NR           |
|              |             |            |             |              |
| NR           | NR          | NR         | NR          | NR           |
